# Supplementary material for: On the nature of hydrogen bonds to platinum(ii) – which interaction can predict their strength?
Source: Royal Society of Chemistry journal article supplement (doi:10.1039/c4cp04657a), 2014-11-19
Supplement: c4cp04657a1.pdf [file c4cp04657a1.pdf]

## Supporting Information

### **On the Nature of Hydrogen Bonds to Platinum(II) – Which Interaction can Predict their Strength?**

*Rocío Sánchez-de-Armas and Mårten S.G. Ahlquist*

Division of Theoretical Chemistry & Biology, School of Biotechnology, KTH  
Royal Institute of Technology, SE-10691 Stockholm, Sweden

## **Content**

|                                        |    |
|----------------------------------------|----|
| Platinum(II) complexes geometries..... | S3 |
|----------------------------------------|----|

## Platinum(II) complexes geometries

### 1. *trans*-[Pt(CH<sub>3</sub>)<sub>2</sub>(NH<sub>3</sub>)<sub>2</sub>]

|    |               |               |               |
|----|---------------|---------------|---------------|
| Pt | -0.0001465911 | 0.0002742934  | 0.0000000000  |
| N  | -0.0005517122 | -0.0019466310 | 2.0820325113  |
| H  | -0.8022798596 | -0.5284820012 | 2.4220469262  |
| H  | 0.8427292801  | -0.4425024668 | 2.4431332241  |
| H  | -0.0653817331 | 0.9458885631  | 2.4469259503  |
| N  | -0.0005517122 | -0.0019466310 | -2.0820325113 |
| H  | 0.8427292801  | -0.4425024668 | -2.4431332241 |
| H  | -0.8022798596 | -0.5284820012 | -2.4220469262 |
| H  | -0.0653817331 | 0.9458885631  | -2.4469259503 |
| C  | -1.0998815863 | 1.8433310168  | 0.0000000000  |
| H  | -2.1879713456 | 1.6748982737  | 0.0000000000  |
| H  | -0.8806949790 | 2.4770564129  | 0.8755935313  |
| H  | -0.8806949790 | 2.4770564129  | -0.8755935313 |
| C  | 1.1054484347  | -1.8403776599 | 0.0000000000  |
| H  | 1.7669708981  | -1.9466772710 | -0.8758091803 |
| H  | 1.7669708981  | -1.9466772710 | 0.8758091803  |
| H  | 0.4426901760  | -2.7195978506 | 0.0000000000  |

### 2. *trans*-[Pt(CN)<sub>2</sub>(CO)<sub>2</sub>]

|    |               |               |               |
|----|---------------|---------------|---------------|
| Pt | 0.0000000000  | 0.0000000000  | 0.0003002069  |
| O  | 3.0846755355  | 0.0000000000  | -0.0005023242 |
| C  | 1.9636346472  | 0.0000000000  | 0.0000795076  |
| O  | -3.0846755355 | 0.0000000000  | -0.0005023242 |
| C  | -1.9636346472 | 0.0000000000  | 0.0000795076  |
| N  | 0.0000000000  | 3.1942731606  | -0.0007937249 |
| C  | 0.0000000000  | 2.0371702729  | -0.0009224797 |
| N  | 0.0000000000  | -3.1942731606 | -0.0007937249 |
| C  | 0.0000000000  | -2.0371702729 | -0.0009224797 |

### 3. *trans*-[Pt(CN)<sub>2</sub>(NH<sub>3</sub>)<sub>2</sub>]

|    |               |               |               |
|----|---------------|---------------|---------------|
| Pt | 0.0020736736  | -0.0006868236 | 0.0000000000  |
| N  | -0.0034604847 | 0.0077268551  | 2.0890675157  |
| H  | -0.9599453777 | 0.0353866143  | 2.4369548323  |
| H  | 0.4625857883  | -0.8163696020 | 2.4636173393  |
| H  | 0.4728754852  | 0.8386596054  | 2.4346041887  |
| N  | -0.0034604847 | 0.0077268551  | -2.0890675157 |
| H  | 0.4625857883  | -0.8163696020 | -2.4636173393 |
| H  | -0.9599453777 | 0.0353866143  | -2.4369548323 |
| H  | 0.4728754852  | 0.8386596054  | -2.4346041887 |
| N  | -1.8001455023 | 2.6287144918  | 0.0000000000  |
| C  | -1.1413308826 | 1.6724031671  | 0.0000000000  |
| N  | 1.7853968878  | -2.6397370481 | 0.0000000000  |
| C  | 1.1370391216  | -1.6761031045 | 0.0000000000  |

4. *trans*-[Pt(CN)<sub>2</sub>(PH<sub>3</sub>)<sub>2</sub>]

|    |               |               |               |
|----|---------------|---------------|---------------|
| Pt | 0.0057938730  | -0.0088518466 | 0.0000000000  |
| P  | -0.0180519545 | 0.0262918651  | 2.3249781833  |
| H  | -1.2890604426 | -0.0129181281 | 2.9243337081  |
| H  | 0.6547557719  | -0.9987217551 | 3.0115548934  |
| H  | 0.5198432375  | 1.1772981837  | 2.9265857249  |
| P  | -0.0180519545 | 0.0262918651  | -2.3249781833 |
| H  | 0.6547557719  | -0.9987217551 | -3.0115548934 |
| H  | -1.2890604426 | -0.0129181281 | -2.9243337081 |
| H  | 0.5198432375  | 1.1772981837  | -2.9265857249 |
| N  | -1.7095136227 | 2.6822539321  | 0.0000000000  |
| C  | -1.0865822663 | 1.7035445040  | 0.0000000000  |
| N  | 1.7185301220  | -2.6910214946 | 0.0000000000  |
| C  | 1.0943429499  | -1.7130490027 | 0.0000000000  |

5. *trans*-[Pt(OH)<sub>2</sub>(NH<sub>3</sub>)<sub>2</sub>]

|    |               |               |               |
|----|---------------|---------------|---------------|
| Pt | 0.0108813259  | 0.0268264502  | 0.0000000000  |
| N  | -0.0404420238 | -0.0153127196 | 2.0670902764  |
| H  | -0.9572904156 | 0.3184161075  | 2.3612314599  |
| H  | 0.1089401380  | -0.9796273992 | 2.3612144872  |
| H  | 0.6731464328  | 0.5705066451  | 2.4929565707  |
| N  | -0.0404420238 | -0.0153127196 | -2.0670902764 |
| H  | 0.1089401380  | -0.9796273992 | -2.3612144872 |
| H  | -0.9572904156 | 0.3184161075  | -2.3612314599 |
| H  | 0.6731464328  | 0.5705066451  | -2.4929565707 |
| O  | 1.1844253030  | -1.6509473381 | 0.0000000000  |
| H  | 2.1092883893  | -1.3930324911 | 0.0000000000  |
| O  | -1.3886858938 | 1.5213110849  | 0.0000000000  |
| H  | -0.9449726985 | 2.3727785835  | 0.0000000000  |

6. *trans*-[Pt(Br)<sub>2</sub>(NH<sub>3</sub>)<sub>2</sub>]

|    |               |               |               |
|----|---------------|---------------|---------------|
| Pt | -0.4326669792 | -0.3431008083 | -0.4045881505 |
| Br | -0.4218624711 | 2.1937386183  | -0.1968439556 |
| Br | -0.4434746020 | -2.8822498384 | -0.5809636070 |
| N  | 1.6444419980  | -0.3423591679 | -0.4061836361 |
| H  | 1.9968535805  | -1.2943279351 | -0.3064190034 |
| H  | 1.9907645470  | 0.0470261001  | -1.2811277908 |
| H  | 1.9989476138  | 0.2354819873  | 0.3540982276  |
| N  | -2.5097693084 | -0.3427273837 | -0.4058788991 |
| H  | -2.8654866306 | -1.0697204860 | 0.2126223607  |
| H  | -2.8620513823 | 0.5664157842  | -0.1069540087 |
| H  | -2.8549679930 | -0.5347543938 | -1.3444302678 |

7. *trans*-[Pt(Br)<sub>2</sub>(PH<sub>3</sub>)<sub>2</sub>]

|    |               |               |               |
|----|---------------|---------------|---------------|
| Pt | 0.0080398815  | -0.0121497944 | 0.0000000000  |
| Br | -1.3131677125 | 2.1858089739  | 0.0000000000  |
| Br | 1.3179186987  | -2.1950022445 | 0.0000000000  |
| P  | -0.0264842246 | 0.0422253135  | 2.3166642410  |
| H  | -1.3008263106 | 0.0516395959  | 2.9136319230  |
| H  | 0.6096416460  | -0.9962987689 | 3.0222674373  |
| H  | 0.5414555500  | 1.1820743833  | 2.9153428769  |
| P  | -0.0264842246 | 0.0422253135  | -2.3166642410 |
| H  | 0.6096416460  | -0.9962987689 | -3.0222674373 |
| H  | -1.3008263106 | 0.0516395959  | -2.9136319230 |
| H  | 0.5414555500  | 1.1820743833  | -2.9153428769 |

8. *trans*-[Pt(Cl)<sub>2</sub>(CO)<sub>2</sub>]

|    |               |               |               |
|----|---------------|---------------|---------------|
| Pt | 0.0001073640  | -0.0004390327 | 0.0000000000  |
| Cl | -1.3469404074 | 1.9400823446  | 0.0000000000  |
| Cl | 1.3483699532  | -1.9400613947 | 0.0000000000  |
| O  | -0.0016754819 | 0.0021855934  | 3.0816802374  |
| C  | -0.0007218083 | 0.0006227732  | 1.9591634833  |
| O  | -0.0016754819 | 0.0021855934  | -3.0816802374 |
| C  | -0.0007218083 | 0.0006227732  | -1.9591634833 |

9. *trans*-[Pt(Cl)<sub>2</sub>(NH<sub>3</sub>)<sub>2</sub>]

|    |               |               |               |
|----|---------------|---------------|---------------|
| Pt | -0.4332207532 | -0.3436039484 | -0.4056241940 |
| Cl | -0.4309660155 | 2.0105118768  | -0.3023591439 |
| Cl | -0.4311850434 | -2.6985161314 | -0.4741649615 |
| N  | 1.6416050352  | -0.3428253210 | -0.4076983423 |
| H  | 1.9857109704  | -1.3027024842 | -0.3847551791 |
| H  | 1.9922072134  | 0.1207811121  | -1.2435285884 |
| H  | 1.9920569472  | 0.1655251127  | 0.4018773987  |
| N  | -2.5086620826 | -0.3408975667 | -0.4030856740 |
| H  | -2.8618030885 | -1.1333115632 | 0.1313136814  |
| H  | -2.8539457721 | 0.5320146272  | -0.0048830364 |
| H  | -2.8569927476 | -0.4215074986 | -1.3563992852 |

10. *trans*-[Pt(Cl)<sub>2</sub>(PH<sub>3</sub>)<sub>2</sub>]

|    |               |               |               |
|----|---------------|---------------|---------------|
| Pt | 0.0068031130  | -0.0103662948 | 0.0000000000  |
| Cl | -1.1528686839 | 2.0600957294  | 0.0000000000  |
| Cl | 1.1586730459  | -2.0675527624 | 0.0000000000  |
| P  | -0.0205954854 | 0.0310347316  | 2.3183897609  |
| H  | -1.2905318088 | -0.0035139409 | 2.9240311747  |
| H  | 0.6482197360  | -0.9987909878 | 3.0061624722  |
| H  | 0.5165462159  | 1.1805608044  | 2.9267836622  |
| P  | -0.0205954854 | 0.0310347316  | -2.3183897609 |
| H  | 0.6482197360  | -0.9987909878 | -3.0061624722 |
| H  | -1.2905318088 | -0.0035139409 | -2.9240311747 |
| H  | 0.5165462159  | 1.1805608044  | -2.9267836622 |

11. *trans*-[Pt(F)<sub>2</sub>(NH<sub>3</sub>)<sub>2</sub>]

|    |               |               |               |
|----|---------------|---------------|---------------|
| Pt | -0.0030624103 | 0.0038422124  | 0.0000000000  |
| F  | -1.0511951880 | 1.7159053838  | 0.0000000000  |
| F  | 1.0526052872  | -1.7076377020 | 0.0000000000  |
| N  | 0.0154602529  | -0.0245176832 | 2.0684006730  |
| H  | -0.9268389706 | -0.1177060449 | 2.4398803001  |
| H  | 0.5762980665  | -0.8236759983 | 2.3618877579  |
| H  | 0.4186531075  | 0.8324727811  | 2.4397221581  |
| N  | 0.0154602529  | -0.0245176832 | -2.0684006730 |
| H  | 0.5762980665  | -0.8236759983 | -2.3618877579 |
| H  | -0.9268389706 | -0.1177060449 | -2.4398803001 |
| H  | 0.4186531075  | 0.8324727811  | -2.4397221581 |
